# Supplementary material
Source: HighWire-hosted journal article supplement (https://tobaccocontrol.bmj.com/highwire/filestream/166248/field_highwire_adjunct_files/0/tc-2022-057905supp001_data_supplement.pdf)

|          |                          | Never established     | Established, non-current | Established, current |
|----------|--------------------------|-----------------------|--------------------------|----------------------|
| ENDS use | Never established        | Never established use | Non-current use          | Cigarette-only use   |
|          | Established, non-current | Non-current use       | Non-current use          | Cigarette-only use   |
|          | Established, current     | ENDS-only use         | ENDS-only user           | Dual use             |

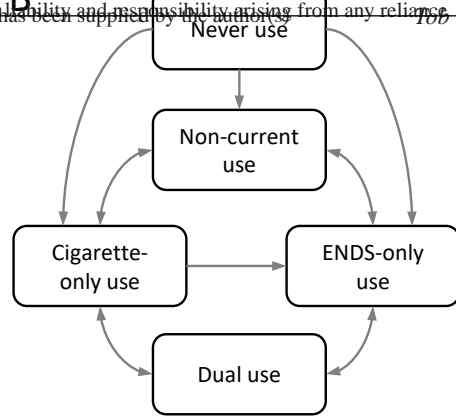

Supplement: tc-2022-057905supp001_data_supplement.pdf [file tc-2022-057905supp001_data_supplement.pdf]
